# Supplementary material
Source: ML conference proceedings conference paper supplement (https://proceedings.neurips.cc/paper_files/paper/2015/hash/cd758e8f59dfdf06a852adad277986ca-Abstract.html)
Supplement: Supplementary file [file cd758e8f59dfdf06a852adad277986ca-Supplemental.zip]

# Supplementary Material

## A Proof of Lemma 1

*Proof.* Let

$$R(u) = \begin{pmatrix} \partial f(x) + A^T y \\ \partial g(y) - Ax \end{pmatrix}$$

be a vector containing the stacked primal and dual residuals (sub-gradients) for (1). Then the optimality condition for (1) can be written succinctly as

$$0 \in R(u^*). \quad (29)$$

Using this notation, it can be seen that the iterates of PDHG satisfy

$$0 \in R(u^{k+1}) + M_k(u^{k+1} - u^k). \quad (30)$$

Subtracting (30) from (29) yields

$$M_k(u^{k+1} - u^k) \in R(u^*) - R(u^{k+1}).$$

Now,  $f$  and  $g$  are convex and therefore  $R$  is monotone. Taking the inner product with  $(u^* - u^{k+1})$  gives us

$$(u^* - u^{k+1})^T M_k(u^{k+1} - u^k) \geq 0. \quad (31)$$

Now, observe the simple identity

$$\|u^k - u^*\|_{M_k}^2 = \|u^{k+1} - u^k\|_{M_k}^2 + \|u^{k+1} - u^*\|_{M_k}^2 + 2(u^k - u^{k+1})^T M_k(u^{k+1} - u^*).$$

Applying (31) to this identity yields the result.  $\square$

## B Proof of Lemma 2

*Proof.* From Assumption C, we may assume without loss of generality that  $Y$  is bounded (the case of bounded  $X$  follows by nearly identical arguments). In this case, we have  $\|y\| \leq C_y$  for all  $y \in Y$ .

Note that

$$\begin{aligned} \|u^{k+1} - u^*\|_{M_{k+1}}^2 &= -2(y^{k+1} - y^*)^T A(x^{k+1} - x^*) + \frac{1}{\tau_{k+1}} \|x^{k+1} - x^*\|^2 + \frac{1}{\sigma_{k+1}} \|y^{k+1} - y^*\|^2 \\ &\geq -2C_y \|A\|_{op} \|x^{k+1} - x^*\| + \frac{1}{\tau_{k+1}} \|x^{k+1} - x^*\|^2 + \frac{1}{\sigma_{k+1}} \|y^{k+1} - y^*\|^2. \end{aligned} \quad (32)$$

When  $\|x^{k+1} - x^*\|$  grows sufficiently large, the term involving the square of this norm dominates the value of (32). Since  $\{\tau_k\}$  and  $\{\sigma_k\}$  are bounded from above, it follows that there is some positive  $C_x$  such that whenever

$$\frac{1}{\tau_{k+1}} \|x^{k+1} - x^*\|^2 + \frac{1}{\sigma_{k+1}} \|y^{k+1} - y^*\|^2 \geq C_x \quad (33)$$

we have

$$\frac{1}{\tau_{k+1}} \|x^{k+1} - x^*\|^2 + \frac{1}{\sigma_{k+1}} \|y^{k+1} - y^*\|^2 \geq 4C_y \|A\|_{op} \|x^{k+1} - x^*\|. \quad (34)$$

Combining (34) with (32) yields

$$2\|u^{k+1} - u^*\|_{M_{k+1}}^2 \geq \frac{1}{\tau_{k+1}} \|x^{k+1} - x^*\|^2 + \frac{1}{\sigma_{k+1}} \|y^{k+1} - y^*\|^2 \quad (35)$$

whenever (33) holds. In this case, we have

$$\begin{aligned} \|u^{k+1} - u^*\|_{M_k}^2 &= -2(y^{k+1} - y^*)^T A(x^{k+1} - x^*) + \frac{1}{\tau_k} \|x^{k+1} - x^*\|^2 + \frac{1}{\sigma_k} \|y^{k+1} - y^*\|^2 \\ &\geq -2(y^{k+1} - y^*)^T A(x^{k+1} - x^*) + \frac{\delta_k}{\tau_{k+1}} \|x^{k+1} - x^*\|^2 + \frac{\delta_k}{\sigma_{k+1}} \|y^{k+1} - y^*\|^2 \\ &= \|u^{k+1} - u^*\|_{M_{k+1}}^2 - \frac{\phi_k}{\tau_{k+1}} \|x^{k+1} - x^*\|^2 - \frac{\phi_k}{\sigma_{k+1}} \|y^{k+1} - y^*\|^2 \\ &\geq (1 - 2\phi_k) \|u^{k+1} - u^*\|_{M_{k+1}}^2. \end{aligned} \quad (36)$$

Applying (36) to Lemma 1, we see that

$$\|u^k - u^*\|_{M_k}^2 \geq (1 - 2\phi_k)\|u^{k+1} - u^*\|_{M_{k+1}}^2. \quad (37)$$

Note that  $\lim_{k \rightarrow \infty} \phi_k = 0$ , and so we may assume without loss of generality that  $1 - 2\phi_k > 0$  (this assumption is only violated for finitely many  $k$ ).

Now, consider the case that (33) does not hold. We have

$$\begin{aligned} \|u^{k+1} - u^*\|_{M_k}^2 &\geq \|u^{k+1} - u^*\|_{M_{k+1}}^2 - \frac{\phi_k}{\tau_{k+1}} \|x^{k+1} - x^*\|^2 - \frac{\phi_k}{\sigma_{k+1}} \|y^{k+1} - y^*\|^2 \\ &\geq \|u^{k+1} - u^*\|_{M_{k+1}}^2 - \phi_k C_x. \end{aligned} \quad (38)$$

Applying (38) to Lemma 1 yields

$$\|u^k - u^*\|_{M_k}^2 \geq \|u^{k+1} - u^*\|_{M_{k+1}}^2 - \phi_k C_x. \quad (39)$$

From (37) and (39), it follows by induction that

$$\|u^0 - u^*\|_{M_0}^2 \geq \prod_{i \in I_C} (1 - 2\phi_i) \|u^{k+1} - u^*\|_{M_{k+1}}^2 - \sum_i \phi_i C_x \quad (40)$$

where  $I_C = \{i \mid \frac{1}{\tau_{i+1}} \|x^{i+1} - x^*\|^2 + \frac{1}{\sigma_{i+1}} \|y^{i+1} - y^*\|^2 \geq C_x\}$ . Note again that we have assumed without loss of generality that  $i$  is large, and thus  $1 - 2\phi_i > 0$ .

We can rearrange (40) to obtain

$$\|u^{k+1} - u^*\|_{M_{k+1}}^2 \leq \frac{\|u^0 - u^*\|_{M_0}^2 + C_x \sum_i \phi_i}{\prod_i (1 - 2\phi_i)} < \infty$$

which shows that  $\{\|u^k - u^*\|_{M_k}^2\}$  remains bounded.

Finally, note that since  $\{\tau_k\}$ ,  $\{\sigma_k\}$ , and  $\{\|u^k - u^*\|_{M_k}\}$  are bounded from above, it follows from (32) that  $\{\frac{1}{\tau_k} \|x^k - x^*\|^2\}$  is bounded from above. But  $\{\frac{1}{\sigma_k} \|y^k - y^*\|^2\}$  is also bounded from above, and so  $\{\|u^k - u^*\|_{H_k}^2\}$  is bounded as well.  $\square$
